# Supplementary material
Source: PubMed Central journal article supplement (PMC6251584)
Supplement: fty015_supp.pdf [file fty015_supp.pdf]

**Table S1.** Composition of vaginal communities found in women colonized by *S. aureus* tst+.

| Phylotype <sup>a</sup>                  | Sample identity and group affiliation |         |         |         |         |         |         |         |         |         |         |         |         |         |         |         |         |         |         |       |       |     | Total number of clones |
|-----------------------------------------|---------------------------------------|---------|---------|---------|---------|---------|---------|---------|---------|---------|---------|---------|---------|---------|---------|---------|---------|---------|---------|-------|-------|-----|------------------------|
|                                         | s10                                   | s9      | s4      | s13     | s40     | s11     | s36     | s41     | s50     | s25     | s44     | s39     | s7      | s22     | s29     | s47     | s48     | s43     | s51     | s37   | s5    |     |                        |
|                                         | Group 1                               | Group 2 | Group 3 | Group 4 | Other | Other |     |                        |
| <i>Lactobacillus iners</i>              | 83%                                   | 0%      | 0%      | 15%     | 52%     | 0%      | 0%      | 0%      | 1%      | 4%      | 0%      | 3%      | 92%     | 93%     | 83%     | 78%     | 100%    | 0%      | 89%     | 91%   | 96%   | 908 |                        |
| <i>Atopobium vaginae</i>                | 0%                                    | 0%      | 82%     | 40%     | 0%      | 20%     | 25%     | 0%      | 0%      | 1%      | 0%      | 0%      | 0%      | 0%      | 0%      | 1%      | 0%      | 9%      | 2%      | 0%    | 0%    | 185 |                        |
| <i>Streptococcus anginosus</i>          | 0%                                    | 6%      | 0%      | 0%      | 0%      | 0%      | 0%      | 67%     | 22%     | 12%     | 0%      | 0%      | 6%      | 0%      | 0%      | 1%      | 0%      | 0%      | 0%      | 0%    | 0%    | 119 |                        |
| <i>Lactobacillus crispatus</i>          | 0%                                    | 76%     | 0%      | 0%      | 0%      | 0%      | 0%      | 0%      | 0%      | 0%      | 0%      | 0%      | 0%      | 0%      | 17%     | 7%      | 0%      | 0%      | 0%      | 0%    | 0%    | 116 |                        |
| <i>Lactobacillus jensenii</i>           | 9%                                    | 0%      | 0%      | 0%      | 0%      | 0%      | 0%      | 0%      | 0%      | 0%      | 87%     | 0%      | 0%      | 0%      | 0%      | 1%      | 0%      | 0%      | 0%      | 5%    | 0%    | 103 |                        |
| <i>Lactobacillus gasseri</i>            | 0%                                    | 0%      | 0%      | 0%      | 0%      | 0%      | 0%      | 0%      | 0%      | 2%      | 5%      | 63%     | 0%      | 0%      | 0%      | 0%      | 0%      | 0%      | 0%      | 0%    | 0%    | 70  |                        |
| <i>Streptococcus mitis</i>              | 0%                                    | 0%      | 0%      | 0%      | 0%      | 7%      | 0%      | 0%      | 5%      | 49%     | 0%      | 0%      | 1%      | 0%      | 0%      | 0%      | 0%      | 0%      | 0%      | 0%    | 0%    | 64  |                        |
| <i>Sneathia sanguinegens</i>            | 0%                                    | 0%      | 0%      | 0%      | 0%      | 16%     | 27%     | 0%      | 0%      | 2%      | 0%      | 0%      | 0%      | 0%      | 0%      | 0%      | 0%      | 12%     | 0%      | 0%    | 0%    | 59  |                        |
| <i>Leptotrichia amnionii</i>            | 0%                                    | 0%      | 0%      | 9%      | 0%      | 7%      | 0%      | 0%      | 0%      | 1%      | 0%      | 0%      | 0%      | 0%      | 0%      | 0%      | 0%      | 25%     | 0%      | 0%    | 0%    | 43  |                        |
| <i>Streptococcus agalactiae</i>         | 0%                                    | 0%      | 0%      | 0%      | 42%     | 0%      | 0%      | 0%      | 0%      | 0%      | 0%      | 0%      | 0%      | 0%      | 0%      | 0%      | 0%      | 0%      | 0%      | 0%    | 0%    | 43  |                        |
| <i>Anaerococcus tetradius</i>           | 0%                                    | 0%      | 0%      | 0%      | 0%      | 0%      | 0%      | 1%      | 40%     | 0%      | 0%      | 0%      | 0%      | 0%      | 0%      | 0%      | 0%      | 0%      | 0%      | 0%    | 0%    | 42  |                        |
| <i>Prevotella sp.</i>                   | 0%                                    | 0%      | 0%      | 12%     | 0%      | 19%     | 1%      | 0%      | 0%      | 3%      | 0%      | 0%      | 0%      | 0%      | 0%      | 0%      | 0%      | 3%      | 0%      | 0%    | 0%    | 39  |                        |
| <i>Staphylococcus aureus</i>            | 0%                                    | 4%      | 7%      | 0%      | 0%      | 0%      | 0%      | 8%      | 0%      | 1%      | 0%      | 6%      | 0%      | 0%      | 0%      | 3%      | 0%      | 0%      | 0%      | 0%    | 0%    | 30  |                        |
| <i>Prevotella bivia</i>                 | 0%                                    | 0%      | 0%      | 5%      | 0%      | 6%      | 1%      | 5%      | 0%      | 2%      | 0%      | 0%      | 0%      | 0%      | 0%      | 2%      | 0%      | 8%      | 0%      | 0%    | 0%    | 29  |                        |
| <i>Megasphaera sp.</i>                  | 0%                                    | 0%      | 0%      | 2%      | 0%      | 0%      | 12%     | 0%      | 0%      | 0%      | 0%      | 0%      | 0%      | 0%      | 0%      | 0%      | 0%      | 6%      | 6%      | 0%    | 0%    | 27  |                        |
| <i>Clostridium sp.</i>                  | 0%                                    | 0%      | 0%      | 5%      | 0%      | 7%      | 0%      | 0%      | 0%      | 0%      | 0%      | 0%      | 0%      | 0%      | 0%      | 0%      | 0%      | 14%     | 0%      | 0%    | 0%    | 26  |                        |
| <i>Ureaplasma parvum</i>                | 0%                                    | 0%      | 1%      | 0%      | 0%      | 0%      | 0%      | 0%      | 17%     | 0%      | 0%      | 0%      | 0%      | 0%      | 0%      | 0%      | 0%      | 0%      | 0%      | 3%    | 0%    | 21  |                        |
| <i>Staphylococcus sp.</i>               | 0%                                    | 1%      | 9%      | 0%      | 0%      | 0%      | 1%      | 7%      | 0%      | 0%      | 0%      | 0%      | 0%      | 0%      | 0%      | 1%      | 0%      | 0%      | 0%      | 0%    | 0%    | 19  |                        |
| <i>Parvimonas micra</i>                 | 0%                                    | 0%      | 0%      | 1%      | 0%      | 3%      | 5%      | 0%      | 0%      | 0%      | 0%      | 0%      | 0%      | 0%      | 0%      | 0%      | 0%      | 9%      | 0%      | 0%    | 0%    | 18  |                        |
| <i>Streptococcus sp.</i>                | 0%                                    | 0%      | 0%      | 0%      | 0%      | 2%      | 0%      | 0%      | 0%      | 9%      | 0%      | 0%      | 2%      | 5%      | 0%      | 0%      | 0%      | 0%      | 0%      | 0%    | 0%    | 18  |                        |
| <i>Prevotella buccalis</i>              | 0%                                    | 0%      | 0%      | 1%      | 0%      | 0%      | 15%     | 0%      | 0%      | 0%      | 0%      | 0%      | 0%      | 0%      | 0%      | 0%      | 0%      | 0%      | 0%      | 0%    | 0%    | 17  |                        |
| <i>Dialister sp.</i>                    | 0%                                    | 1%      | 0%      | 1%      | 0%      | 9%      | 0%      | 0%      | 0%      | 0%      | 0%      | 0%      | 0%      | 0%      | 0%      | 0%      | 0%      | 3%      | 1%      | 0%    | 0%    | 15  |                        |
| <i>Veillonella montpellierensis</i>     | 0%                                    | 0%      | 0%      | 0%      | 0%      | 0%      | 0%      | 13%     | 0%      | 0%      | 0%      | 0%      | 0%      | 0%      | 0%      | 1%      | 0%      | 0%      | 0%      | 0%    | 0%    | 14  |                        |
| <i>Lactobacillus aviarius</i>           | 0%                                    | 1%      | 0%      | 0%      | 2%      | 1%      | 0%      | 0%      | 0%      | 1%      | 0%      | 8%      | 0%      | 0%      | 0%      | 0%      | 0%      | 0%      | 0%      | 0%    | 0%    | 13  |                        |
| <i>Alloscardovia omnicolens</i>         | 0%                                    | 4%      | 0%      | 0%      | 0%      | 1%      | 0%      | 0%      | 0%      | 5%      | 0%      | 0%      | 0%      | 0%      | 0%      | 0%      | 0%      | 0%      | 0%      | 0%    | 0%    | 11  |                        |
| <i>Lactobacillus fornicalis</i>         | 7%                                    | 0%      | 0%      | 0%      | 0%      | 0%      | 0%      | 0%      | 0%      | 0%      | 1%      | 0%      | 0%      | 0%      | 0%      | 0%      | 0%      | 0%      | 0%      | 0%    | 0%    | 8   |                        |
| <i>Eggerthella sp.</i>                  | 0%                                    | 0%      | 0%      | 0%      | 0%      | 2%      | 0%      | 0%      | 0%      | 0%      | 0%      | 0%      | 0%      | 0%      | 0%      | 0%      | 0%      | 5%      | 0%      | 0%    | 0%    | 7   |                        |
| <i>Finegoldia magna</i>                 | 0%                                    | 0%      | 0%      | 0%      | 0%      | 1%      | 0%      | 0%      | 3%      | 0%      | 0%      | 0%      | 0%      | 0%      | 0%      | 3%      | 0%      | 0%      | 0%      | 0%    | 0%    | 7   |                        |
| <i>Fusobacterium gonidiaformans</i>     | 0%                                    | 0%      | 0%      | 0%      | 0%      | 0%      | 0%      | 0%      | 0%      | 0%      | 0%      | 6%      | 0%      | 0%      | 0%      | 1%      | 0%      | 0%      | 0%      | 0%    | 0%    | 7   |                        |
| <i>Ralstonia pickettii</i>              | 0%                                    | 0%      | 0%      | 0%      | 1%      | 0%      | 0%      | 0%      | 0%      | 0%      | 0%      | 4%      | 0%      | 0%      | 0%      | 0%      | 0%      | 0%      | 2%      | 0%    | 0%    | 7   |                        |
| <i>Lactobacillus vaginalis</i>          | 0%                                    | 1%      | 0%      | 0%      | 0%      | 0%      | 0%      | 0%      | 0%      | 0%      | 4%      | 0%      | 0%      | 0%      | 0%      | 0%      | 0%      | 0%      | 0%      | 1%    | 0%    | 6   |                        |
| <i>Megasphaera cerevisiae</i>           | 0%                                    | 0%      | 0%      | 3%      | 0%      | 0%      | 1%      | 0%      | 0%      | 0%      | 0%      | 0%      | 0%      | 0%      | 0%      | 0%      | 0%      | 2%      | 0%      | 0%    | 0%    | 6   |                        |
| <i>Aerococcus christensenii</i>         | 0%                                    | 0%      | 0%      | 0%      | 0%      | 0%      | 0%      | 0%      | 5%      | 0%      | 0%      | 0%      | 0%      | 0%      | 0%      | 0%      | 0%      | 0%      | 0%      | 0%    | 0%    | 5   |                        |
| <i>Gardnerella vaginalis</i>            | 0%                                    | 0%      | 1%      | 0%      | 0%      | 0%      | 0%      | 0%      | 1%      | 0%      | 0%      | 0%      | 0%      | 0%      | 0%      | 0%      | 0%      | 0%      | 0%      | 0%    | 3%    | 5   |                        |
| <i>Lachnobacterium bovis</i>            | 0%                                    | 0%      | 0%      | 0%      | 0%      | 0%      | 5%      | 0%      | 0%      | 0%      | 0%      | 0%      | 0%      | 0%      | 0%      | 0%      | 0%      | 0%      | 0%      | 0%    | 0%    | 5   |                        |
| <i>Lactobacillus sp.</i>                | 2%                                    | 0%      | 0%      | 0%      | 0%      | 0%      | 0%      | 0%      | 0%      | 0%      | 3%      | 0%      | 0%      | 0%      | 0%      | 0%      | 0%      | 0%      | 0%      | 0%    | 0%    | 5   |                        |
| <i>Peptoniphilus sp.</i>                | 0%                                    | 0%      | 0%      | 1%      | 0%      | 0%      | 2%      | 0%      | 1%      | 1%      | 0%      | 0%      | 0%      | 0%      | 0%      | 0%      | 0%      | 0%      | 0%      | 0%    | 0%    | 5   |                        |
| <i>Peptostreptococcus sp.</i>           | 0%                                    | 0%      | 0%      | 1%      | 0%      | 0%      | 0%      | 0%      | 0%      | 4%      | 0%      | 0%      | 0%      | 0%      | 0%      | 0%      | 0%      | 0%      | 0%      | 0%    | 0%    | 5   |                        |
| <i>Ralstonia sp.</i>                    | 0%                                    | 0%      | 0%      | 0%      | 0%      | 0%      | 0%      | 0%      | 0%      | 0%      | 0%      | 5%      | 0%      | 0%      | 0%      | 0%      | 0%      | 0%      | 0%      | 0%    | 0%    | 5   |                        |
| <i>Gemella haemolysans</i>              | 0%                                    | 0%      | 0%      | 0%      | 0%      | 0%      | 0%      | 0%      | 0%      | 2%      | 0%      | 0%      | 0%      | 2%      | 0%      | 0%      | 0%      | 0%      | 0%      | 0%    | 0%    | 4   |                        |
| Novel bacterium                         | 0%                                    | 0%      | 0%      | 2%      | 0%      | 1%      | 0%      | 0%      | 0%      | 0%      | 0%      | 1%      | 0%      | 0%      | 0%      | 0%      | 0%      | 0%      | 0%      | 0%    | 0%    | 4   |                        |
| <i>Anaerococcus octavius</i>            | 0%                                    | 0%      | 0%      | 0%      | 0%      | 0%      | 0%      | 0%      | 0%      | 2%      | 0%      | 0%      | 0%      | 0%      | 0%      | 1%      | 0%      | 0%      | 0%      | 0%    | 0%    | 3   |                        |
| <i>Dialister microaerophilus</i>        | 0%                                    | 0%      | 0%      | 0%      | 0%      | 0%      | 1%      | 0%      | 0%      | 0%      | 0%      | 0%      | 0%      | 0%      | 0%      | 0%      | 0%      | 2%      | 0%      | 0%    | 0%    | 3   |                        |
| <i>Megasphaera elsdenii</i>             | 0%                                    | 0%      | 0%      | 0%      | 0%      | 0%      | 1%      | 0%      | 1%      | 0%      | 0%      | 0%      | 0%      | 0%      | 0%      | 0%      | 0%      | 1%      | 0%      | 0%    | 0%    | 3   |                        |
| <i>Anaerococcus lactolyticus</i>        | 0%                                    | 0%      | 0%      | 0%      | 0%      | 0%      | 0%      | 0%      | 2%      | 0%      | 0%      | 0%      | 0%      | 0%      | 0%      | 0%      | 0%      | 0%      | 0%      | 0%    | 0%    | 2   |                        |
| <i>Anaerococcus prevotii</i>            | 0%                                    | 0%      | 0%      | 0%      | 0%      | 0%      | 0%      | 0%      | 2%      | 0%      | 0%      | 0%      | 0%      | 0%      | 0%      | 0%      | 0%      | 0%      | 0%      | 0%    | 0%    | 2   |                        |
| <i>Eubacterium sp.</i>                  | 0%                                    | 0%      | 0%      | 0%      | 0%      | 0%      | 2%      | 0%      | 0%      | 0%      | 0%      | 0%      | 0%      | 0%      | 0%      | 0%      | 0%      | 0%      | 0%      | 0%    | 0%    | 2   |                        |
| <i>Gemella palaticanis</i>              | 0%                                    | 0%      | 0%      | 1%      | 0%      | 1%      | 0%      | 0%      | 0%      | 0%      | 0%      | 0%      | 0%      | 0%      | 0%      | 0%      | 0%      | 0%      | 0%      | 0%    | 0%    | 2   |                        |
| <i>Howardella sp.</i>                   | 0%                                    | 2%      | 0%      | 0%      | 0%      | 0%      | 0%      | 0%      | 0%      | 0%      | 0%      | 0%      | 0%      | 0%      | 0%      | 0%      | 0%      | 0%      | 0%      | 0%    | 0%    | 2   |                        |
| <i>Lactobacillus hamsteri</i>           | 0%                                    | 2%      | 0%      | 0%      | 0%      | 0%      | 0%      | 0%      | 0%      | 0%      | 0%      | 0%      | 0%      | 0%      | 0%      | 0%      | 0%      | 0%      | 0%      | 0%    | 0%    | 2   |                        |
| <i>Methylobacteriaceae bacterium</i>    | 0%                                    | 0%      | 0%      | 0%      | 0%      | 0%      | 0%      | 0%      | 0%      | 0%      | 0%      | 2%      | 0%      | 0%      | 0%      | 0%      | 0%      | 0%      | 0%      | 0%    | 0%    | 2   |                        |
| <i>Brevibacterium sp.</i>               | 0%                                    | 0%      | 0%      | 0%      | 0%      | 0%      | 0%      | 0%      | 0%      | 1%      | 0%      | 0%      | 0%      | 0%      | 0%      | 0%      | 0%      | 0%      | 0%      | 0%    | 0%    | 1   |                        |
| <i>Corynebacterium pseudogenitalium</i> | 0%                                    | 0%      | 0%      | 0%      | 0%      | 0%      | 0%      | 0%      | 0%      | 0%      | 0%      | 0%      | 0%      | 0%      | 0%      | 0%      | 0%      | 0%      | 0%      | 0%    | 1%    | 1   |                        |
| <i>Dialister propionificiens</i>        | 0%                                    | 0%      | 0%      | 1%      | 0%      | 0%      | 0%      | 0%      | 0%      | 0%      | 0%      | 0%      | 0%      | 0%      | 0%      | 0%      | 0%      | 0%      | 0%      | 0%    | 0%    | 1   |                        |
| <i>Erythrobacter sp.</i>                | 0%                                    | 0%      | 0%      | 0%      | 1%      | 0%      | 0%      | 0%      | 0%      | 0%      | 0%      | 0%      | 0%      | 0%      | 0%      | 0%      | 0%      | 0%      | 0%      | 0%    | 0%    | 1   |                        |
| <i>Escherichia coli</i>                 | 0%                                    | 0%      | 0%      | 0%      | 1%      | 0%      | 0%      | 0%      | 0%      | 0%      | 0%      | 0%      | 0%      | 0%      | 0%      | 0%      | 0%      | 0%      | 0%      | 0%    | 0%    | 1   |                        |
| <i>Escherichia sp.</i>                  | 0%                                    | 0%      | 0%      | 0%      | 1%      | 0%      | 0%      | 0%      | 0%      | 0%      | 0%      | 0%      | 0%      | 0%      | 0%      | 0%      | 0%      | 0%      | 0%      | 0%    | 0%    | 1   |                        |
| <i>Facklamia hominis</i>                | 0%                                    | 0%      | 0%      | 0%      | 0%      | 0%      | 0%      | 0%      | 1%      | 0%      | 0%      | 0%      | 0%      | 0%      | 0%      | 0%      | 0%      | 0%      | 0%      | 0%    | 0%    | 1   |                        |
| <i>Friedmanniella sp.</i>               | 0%                                    | 0%      | 0%      | 0%      | 0%      | 0%      | 0%      | 0%      | 0%      | 0%      | 0%      | 1%      | 0%      | 0%      | 0%      | 0%      | 0%      | 0%      | 0%      | 0%    | 0%    | 1   |                        |
| <i>Helcococcus sp.</i>                  | 0%                                    | 0%      | 0%      | 0%      | 0%      | 0%      | 0%      | 0%      | 0%      | 0%      | 0%      | 0%      | 0%      | 0%      | 1%      | 0%      | 0%      | 0%      | 0%      | 0%    | 0%    | 1   |                        |
| <i>Lachnospiraceae genomosp</i>         | 0%                                    | 0%      | 0%      | 0%      | 0%      | 0%      | 0%      | 0%      | 0%      | 0%      | 0%      | 0%      | 0%      | 0%      | 0%      | 0%      | 0%      | 1%      | 0%      | 0%    | 0%    | 1   |                        |
| <i>Lactobacillus acidophilus</i>        | 0%                                    | 1%      | 0%      | 0%      | 0%      | 0%      | 0%      | 0%      | 0%      | 0%      | 0%      | 0%      | 0%      | 0%      | 0%      | 0%      | 0%      | 0%      | 0%      | 0%    | 0%    | 1   |                        |
| <i>Lactobacillus helveticus</i>         | 0%                                    | 1%      | 0%      | 0%      | 0%      | 0%      | 0%      | 0%      | 0%      | 0%      | 0%      | 0%      | 0%      | 0%      | 0%      | 0%      | 0%      | 0%      | 0%      | 0%    | 0%    | 1   |                        |
| <i>Lactobacillus manihotivorans</i>     | 0%                                    | 1%      | 0%      | 0%      | 0%      | 0%      | 0%      | 0%      | 0%      | 0%      | 0%      | 0%      | 0%      | 0%      | 0%      | 0%      | 0%      | 0%      | 0%      | 0%    | 0%    | 1   |                        |
| <i>Mobiluncus curtisii</i>              | 0%                                    | 0%      | 0%      | 0%      | 0%      | 0%      | 0%      | 0%      | 0%      | 0%      | 0%      | 0%      | 0%      | 0%      | 0%      | 0%      | 0%      | 1%      | 0%      | 0%    | 0%    | 1   |                        |
| <i>Moryella sp.</i>                     | 0%                                    | 0%      | 0%      | 0%      | 0%      | 0%      | 0%      | 0%      | 0%      | 0%      | 0%      | 0%      | 0%      | 0%      | 0%      | 0%      | 0%      | 1%      | 0%      | 0%    | 0%    | 1   |                        |
| <i>Pediococcus sp.</i>                  | 0%                                    | 1%      | 0%      | 0%      | 0%      | 0%      | 0%      | 0%      | 0%      | 0%      | 0%      | 0%      | 0%      | 0%      | 0%      | 0%      | 0%      | 0%      | 0%      | 0%    | 0%    | 1   |                        |
| <i>Selenomonas sp.</i>                  | 0%                                    | 0%      | 0%      | 1%      | 0%      | 0%      | 0%      | 0%      | 0%      | 0%      | 0%      | 0%      | 0%      | 0%      | 0%      | 0%      | 0%      | 0%      | 0%      | 0%    | 0%    | 1   |                        |
| <i>Sphingomonas rhizophages</i>         | 0%                                    | 0%      | 0%      | 0%      | 0%      | 0%      | 0%      | 0%      | 0%      | 0%      | 0%      | 1%      | 0%      | 0%      | 0%      | 0%      | 0%      | 0%      | 0%      | 0%    | 0%    | 1   |                        |

<sup>a</sup> Each sequence from the clone library was compared to the RDP II database (<http://www.ibest.uidaho.edu/wiki/index.php/HITSA>), using the BLAST algorithm. The classification of clones was done by comparing their 16S rRNA gene sequences to those of known organisms. The genus and species names were used if the sequence similarity to a type species was >97%; the genus name only was used if the sequence similarity was <97% but >90%; and a clone was designated as novel if the sequence similarity to known organisms was <90%.
